# Supplementary material for: Unraveling Macroplastic Pollution in Rural and Urban Beaches in Sarangani Bay Protected Seascape, Mindanao, Philippines
Source: MDPI journal article supplement (doi:10.3390/jmse10101532), 2022-10-19
Supplement: s1 [file s1]

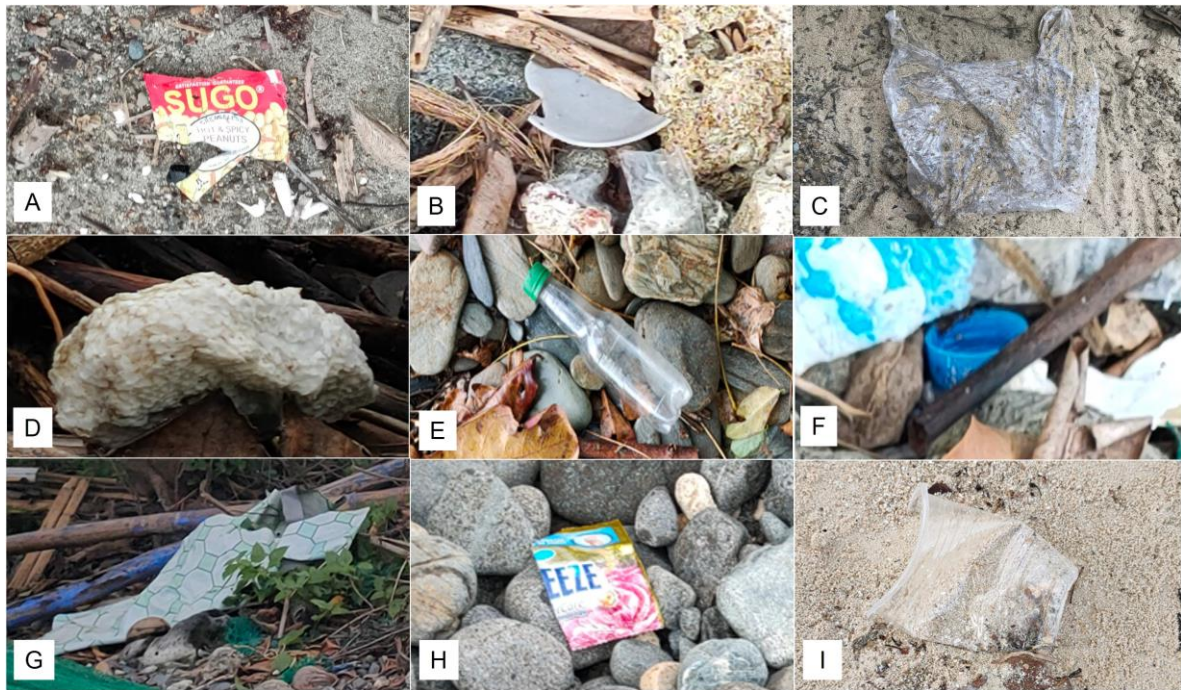

**Figure S1.** Types of macroplastic litter based on their uses: (A) food packaging; (B) fragment; (C) polyethylene bag or *sando* bag; (D) Styrofoam; (E) plastic bottle; (F) bottle cap; (G) mat; (H) toiletry; (I) disposable cup.
