# Supplementary material for: Unraveling Macroplastic Pollution in Rural and Urban Beaches in Sarangani Bay Protected Seascape, Mindanao, Philippines
Source: MDPI journal article supplement (doi:10.3390/jmse10101532), 2022-10-19
Supplement: s1 [file s1]

Archive with 1 entries (1 files):
- jmse-1950573-Supplementary.pdf
